# Supplementary material for: Pyroelectric Catalysis-based “Nano-lymphatic” Reduces Tumor Interstitial Pressure for Enhanced Penetration and Hydrodynamic Therapy
Source: Research Square preprint supplement (doi:10.21203/rs.3.rs-156886/v1), 2021-02-04
Supplement: Supplementary file 1 [file 7bf30521959d0454d9d7e8b7.docx]

**Supplementary Information**

Pyroelectric Catalysis-based “Nano-lymphatic” Reduces Tumor Interstitial Pressure for Enhanced Penetration and Hydrodynamic Therapy

Yuchu He1, Zhuo Li1, Cong Cong1, Fei Ye1, Jingyue Yang1, Xuwu Zhang1, Yi Yuan2, Zhenhe Ma3, Kaiqing Zhang2, Yang Lin3, Lizhao Zheng3, Dawei Gao1*

1. State Key Laboratory of Metastable Materials Science and Technology, Applying Chemistry Key Lab of Hebei Province, Yanshan University, Qinhuangdao 066004, P. R. China
2. School of Electrical Engineering, Yanshan University, Qinhuangdao 066004, P. R. China
3. School of Control Engineering, Northeastern University at Qinhuangdao, Qinhuangdao 066004, P. R. China

*Corresponding author: Prof. Dawei Gao, Tel: (+86)13930338376.

E-mail: dwgao@ysu.edu.cn

**Supplementary Figure 1.** Zeta potentials of MXene, CdS NPs, M/CdS and M/CdS-HA.


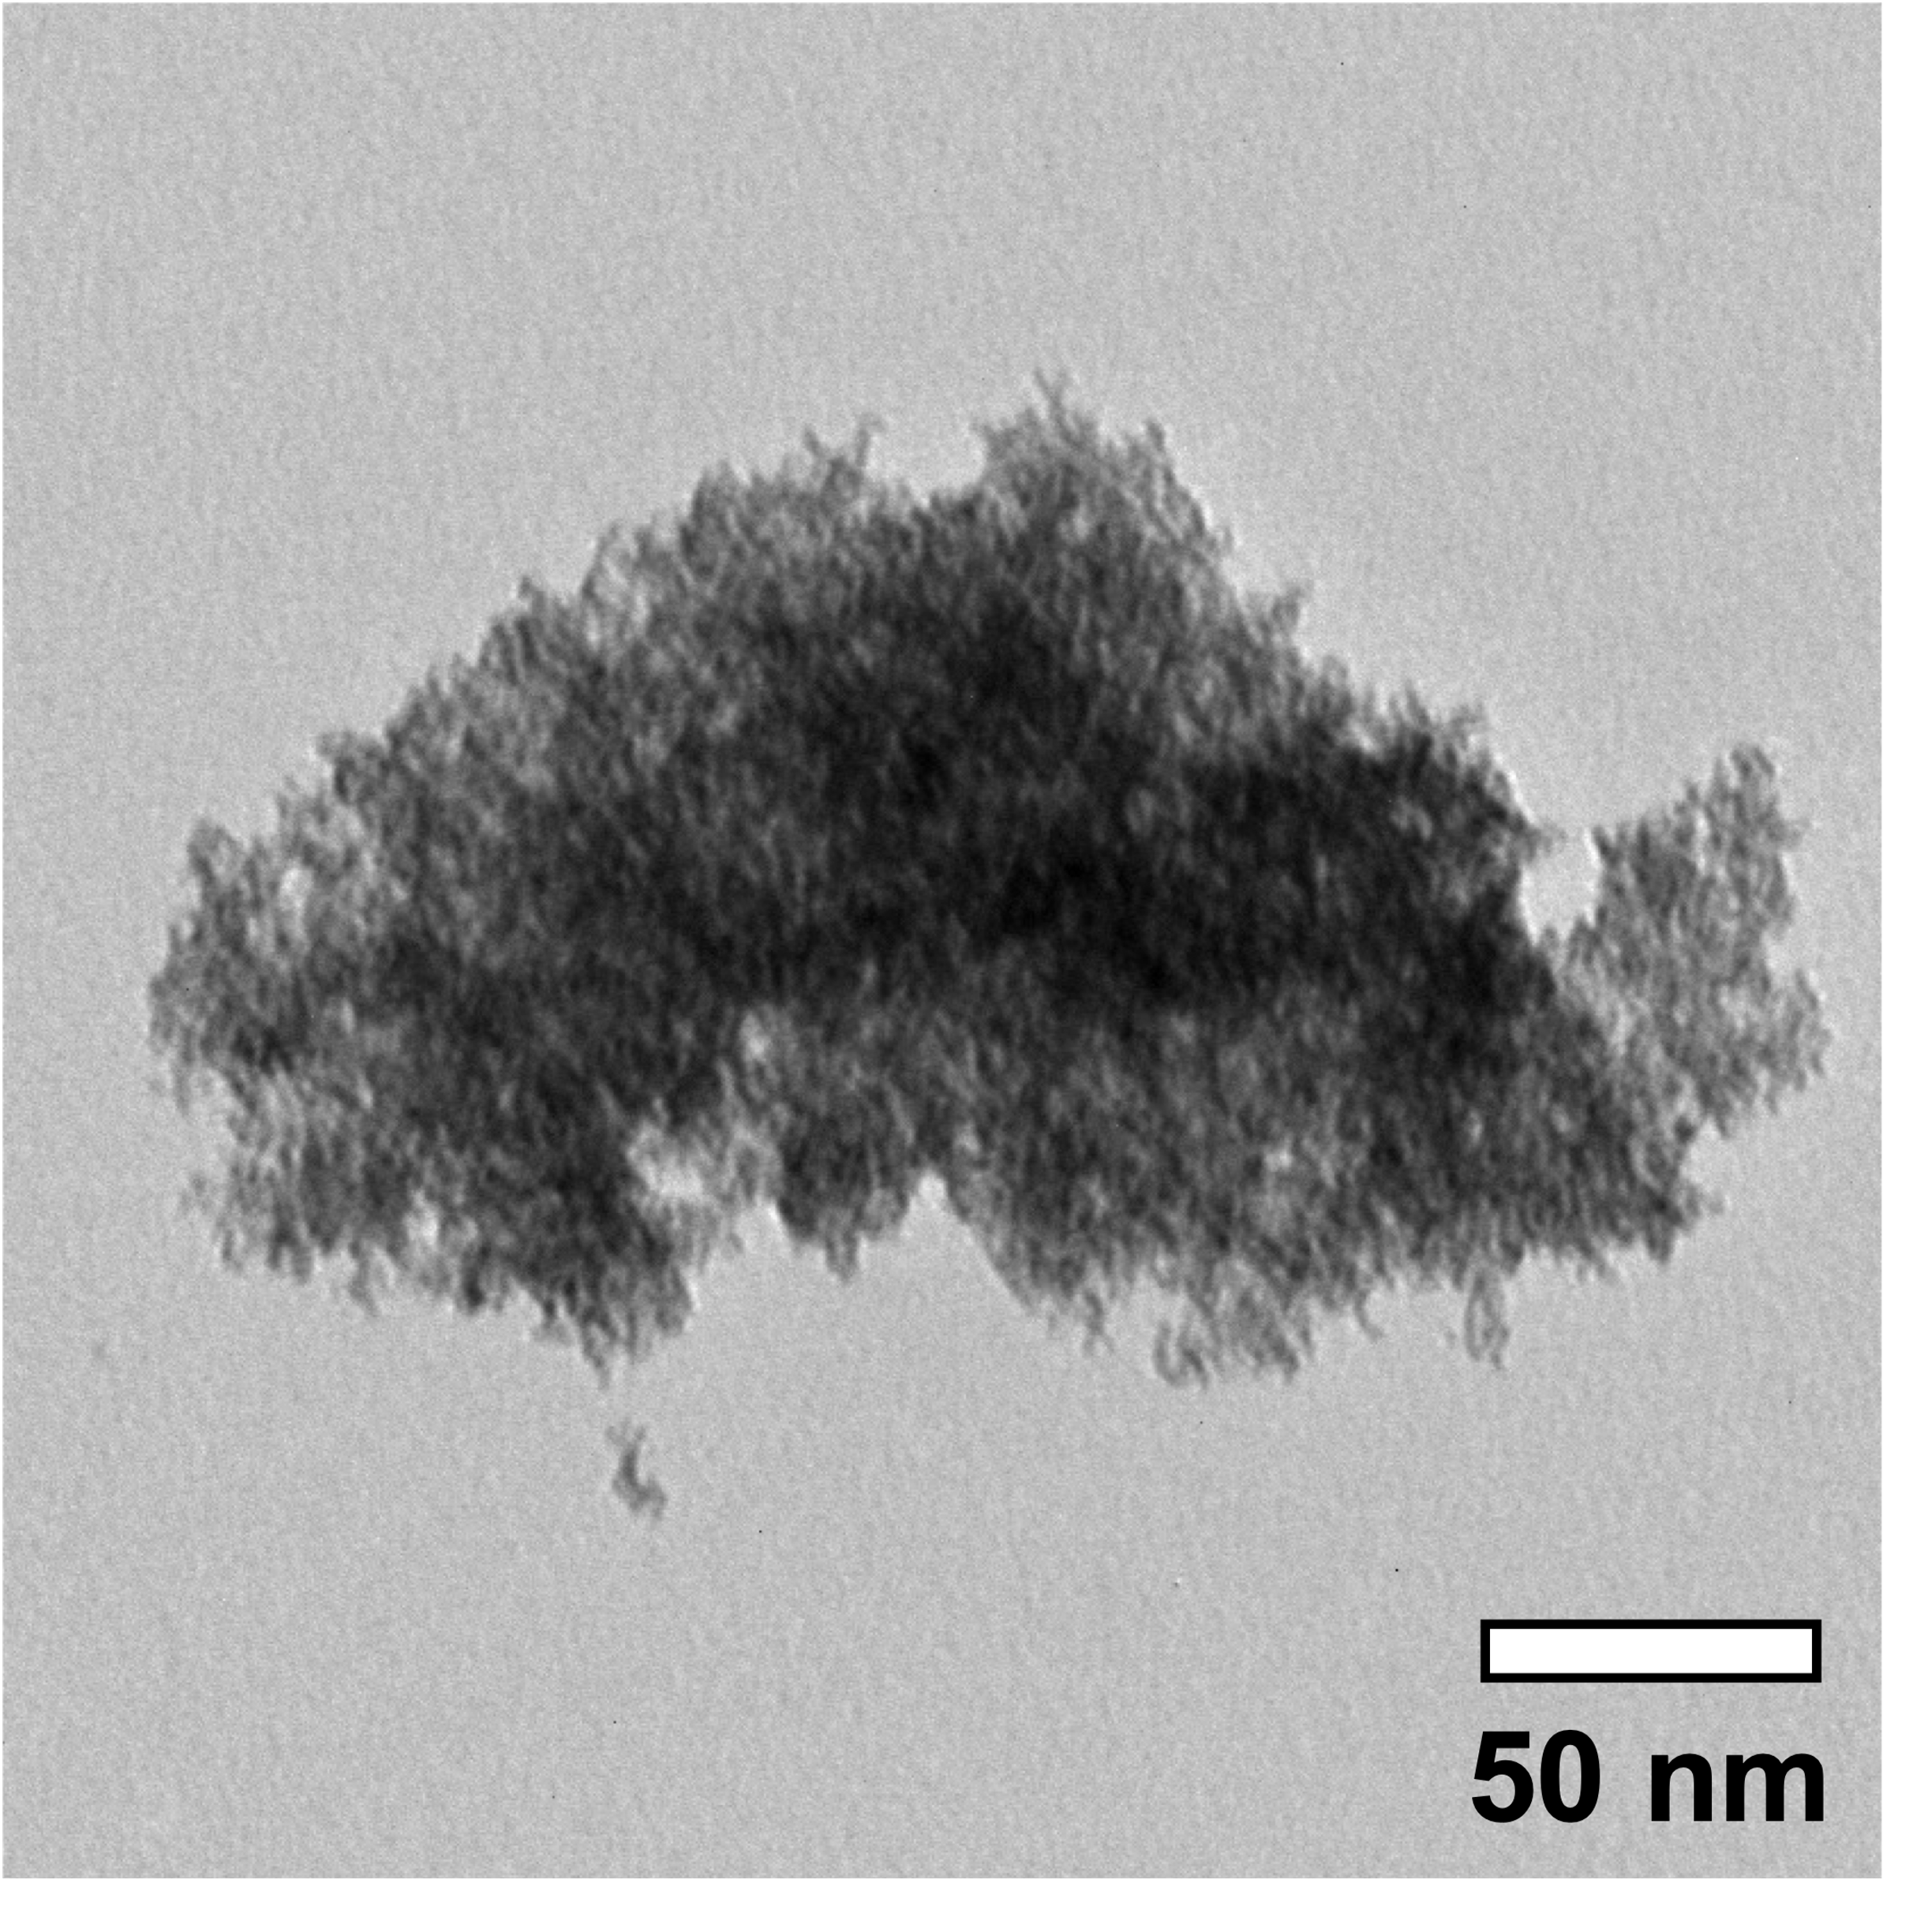


**Supplementary Figure 2.** TEM image of M/CdS after 5 min of 1064-nm laser irradiation.


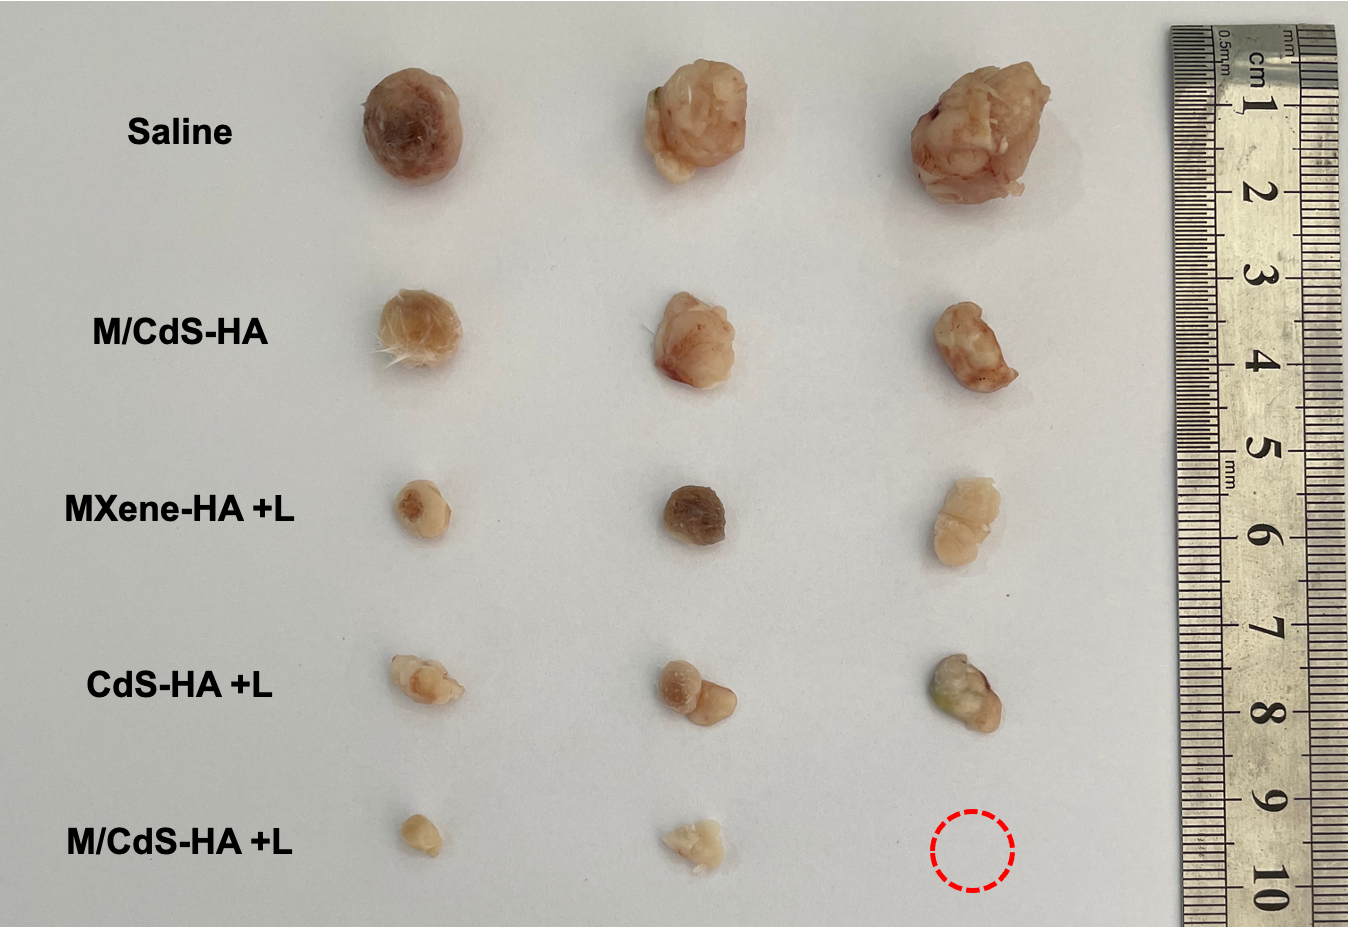


**Supplementary Figure 3.** Tumor photograph of mice treated with Saline, M/CdS-HA, MXene-HA +L, CdS-HA +L and M/CdS-HA +L.


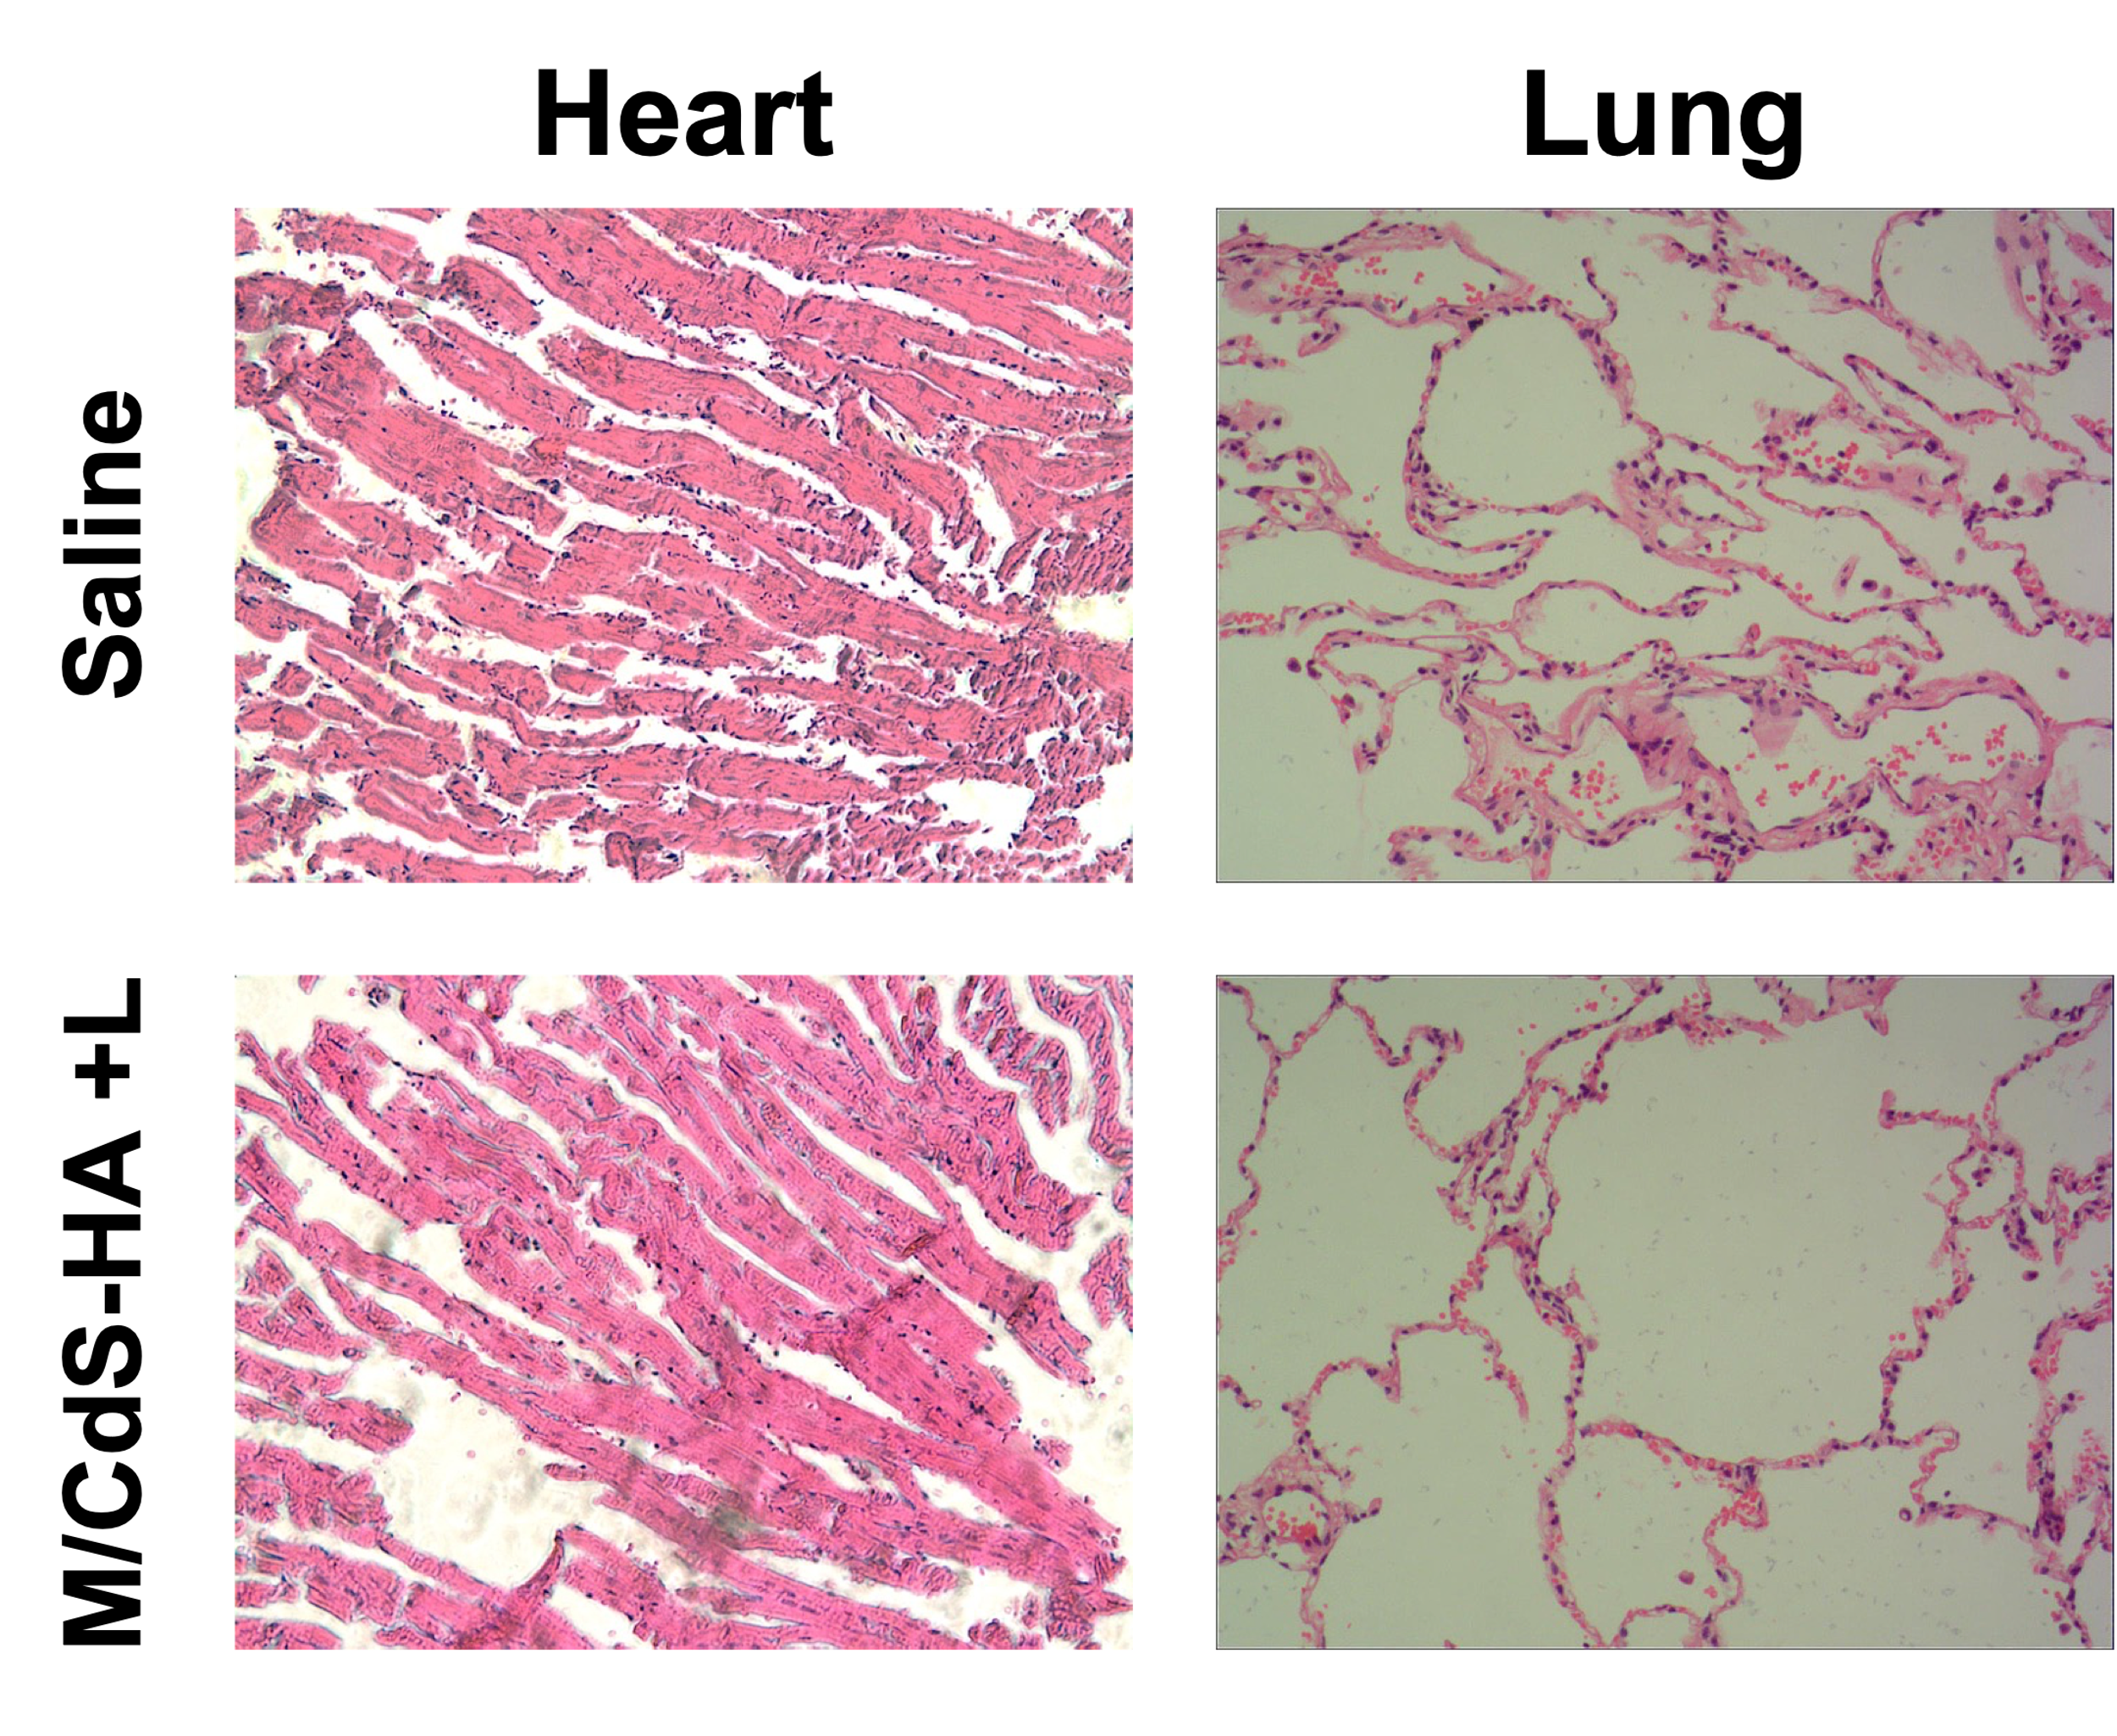


**Supplementary Figure 4.** Histological H&E staining for heart and lung from the mice treated with Saline and M/CdS-HA +L.
